# Supplementary material
Source: MDPI journal article supplement (https://www.mdpi.com/1996-1073/13/9/2132)
Supplement: s1 [file s1]

# Thermodynamics Based Process Sustainability Evaluation

Petar Sabev Varbanov <sup>1,\*</sup>, Hon Huin Chin <sup>1</sup>, Alexandra-Elena Plesu Popescu <sup>2</sup> and Stanislav Boldyryev <sup>3</sup>

<sup>1</sup> Sustainable Process Integration Laboratory-SPIL, NETME Centre, Faculty of Mechanical Engineering, Brno University of Technology-VUT Brno, Technická 2896/2, 61669 Brno, Czech Republic

<sup>2</sup> University of Barcelona, Faculty of Chemistry, Department of Chemical Engineering and Analytical Chemistry, 1-10 Martí i Franqués St., Floor 6, 08028 Barcelona, Spain e-mail: a\_plesu@ub.edu

<sup>3</sup> Tomsk Polytechnic University, Lenin Avenue 30, Tomsk, Russia; sboldyryev@tpu.ru

\* Correspondence: varbanov@fme.vutbr.cz; Tel.: +420-778-723-400

## Supplementary Material

### 1. Exergy profit calculation for output stream in case study 1

**The calculation for the purge stream:**

Assuming a 100 kg/h of purge stream waste is produced from methanol carbonylation and using data from **Table 2**

Exergy of purge stream:

$$= \{\text{Mass flowrate of purge stream}\} \times \{\text{Total specific exergy content of purge stream}\}$$

$$= 100 \text{ [kg/h]} \times (-71.274 \text{ [kJ/kg]})/3,600$$

$$= -1.98 \text{ kW}$$

$$= -0.00198 \text{ MW}$$

**The specific exergy to be added to the VAM production process is 0.532 MW per 1 t/h of Acetic Acid feed (simulation results). Note that the exergy to separate acetic acid is ignored, as the purpose is to evaluate the potential of waste acetic acid.**

If all the content of the purge stream is to be sent to the VAM process, the exergy liability of the purge stream is

$$= \{\text{Exergy of input streams}\} + \{\text{Exergy for the heat and work}\}$$

$$= \sum_i \{\text{Mass flowrate of input stream 'i'}\} \times \{\text{Total specific exergy of input stream 'i'}\} + \{\text{Mass flowrate of acetic acid feed}\} \times \{\text{Specific exergy added to the VAM process}\}$$

$$= 100 \text{ [kg/h]} \times (0.0556 \times (-152.92 \text{ [kJ/kg]}) + 0.382 \times 0.00169 \text{ [kJ/kg]} + 0.394 \times 1.74 \text{ [kJ/kg]})/3,600,000 + 0.532 \text{ [MW/t]} \times 100 \text{ [kg/h]}/1,000$$

$$= -0.000216 + 0.0532$$

$$= 0.0530 \text{ MW}$$

**Exergy contents/assets of the output products:**

$$= \{\text{Exergy of output streams}\}$$

$$= \sum_j (\{\text{Mass flowrate of output stream 'j'}\} \times \{\text{Total specific exergy of output stream 'j'}\})$$

$$= \{\text{Exergy of VAM}\} + \{\text{Exergy of waste water}\} + \{\text{Exergy of waste AA}\} + \{\text{Exergy of purge gas}\} + \{\text{Exergy of waste glycerol}\}$$

$$= 100 \text{ [kg/h]} \times (0.0496 \times 7.63 \text{ [kJ/kg]} + 0.0131 \times (-37.572 \text{ [kJ/kg]}) + 0.0679 \times 208.234 \text{ [kJ/kg]} + 1.64 \times (-215.21 \text{ [kJ/kg]}) + 0.0607 \times 155.788 \text{ [kJ/kg]})/3,600,000$$

$$= 0.00330 \text{ MW}$$

**Net Exergy Profit of the purge stream**

$$= 0.0033 - 0.0530$$

$$= -0.0497 \text{ MW (original is -0.00198 MW) (increased loss)}$$

## 2. Exergy profit calculation for input stream in case study 1

### Calculation for the acetic acid inlet stream:

Assuming a 100 kg/h of acetic acid inlet stream is input into VAM production process and using data from **Table 1**:

### Exergy of the acetic acid stream

$$\begin{aligned}
 &= \{\text{Mass flowrate of acetic acid stream}\} \times \{\text{Total specific exergy content of acetic acid stream}\} \\
 &= 100 \text{ [kg/h]} \times (0.250 \text{ [kJ/kg]})/3,600 \\
 &= 0.00694 \text{ kW} \\
 &= 0.000064 \text{ MW}
 \end{aligned}$$

**The exergy to be added to the methanol carbonylation process is 0.458 MW per 1 t/h of Acetic Acid production [76]**

### The exergy liability of the acetic acid stream:

$$\begin{aligned}
 &= \{\text{Exergy of input Methanol}\} + \{\text{Exergy of input CO}\} + \{\text{Exergy losses with: Vent CO + Exergy of propionic acid and the purge stream}\} + \{\text{Exergy for the heat and work}\} \\
 &= 100 \text{ [kg/h]} \times (-263.145 \text{ [kJ/kg]} + 60.547 \text{ [kJ/kg]} + 145.745 \text{ [kJ/kg]} + 106.566 \text{ [kJ/kg]} + 71.247 \text{ [kJ/kg]})/3,600,000 + 0.458 \text{ [MW/t]} \times 100 \text{ [kg/h]}/1,000 \\
 &= 0.0034 + 0.0458 \\
 &= 0.0492 \text{ MW}
 \end{aligned}$$

### Exergy assets of the output products:

$$\begin{aligned}
 &= \{\text{Exergy of Purge Methanol}\} \\
 &= 100 \text{ [kg/h]} \times (83.209 \text{ [kJ/kg]})/3,600,000 \\
 &= 0.0023 \text{ MW}
 \end{aligned}$$

### Net Exergy Profit of the acetic acid feed stream

$$\begin{aligned}
 &= 0.0023 - 0.0492 \\
 &= -0.0468 \text{ MW (a loss)}
 \end{aligned}$$

## 3. Exergy profit calculation for MSW stream, sending to MBCT system in case study 2

Using data from Table 6, the calculation of exergy of the MSW stream is shown below:

Assuming basis of 1 t/h of MSW, according to Figure 9,

Recyclables = 215 kg/h

Landfill = 157 kg/h

AD inlet = 285 kg/h

Chemical conversion inlet = 398 kg/h

### Total Exergy to be added to the recycling, landfill, AD and chemical conversion (assuming 8.05 % of plastics in recyclables)

$$\begin{aligned}
 &= 215 \text{ [kg/h]} \times (0.0805) \times (10.4 \text{ [MJ/kg]}) + 157 \text{ [kg/h]} \times (0.336 \text{ [MJ/kg]}) + 285 \text{ [kg/h]} \times (1.09 \text{ [MJ/kg]}) \\
 &+ 398 \text{ [kg/h]} \times (3.02 \text{ [MJ/kg]}) \\
 &= 1744.3 \text{ MJ/h} \\
 &= 0.484 \text{ MW}
 \end{aligned}$$

**Total Useful Exergy of secondary products from recycling, landfill, AD , and chemical conversion (assuming 8.05 % of plastics in recyclables)**

$$\begin{aligned}
 &= 215 \text{ [kg/h]} \times (0.0805) \times (33.1 \text{ [MJ/kg]}) + 157 \text{ [kg/h]} \times (0.242 \text{ [MJ/kg]}) + 285 \text{ [kg/h]} \times (1.41 \text{ [MJ/kg]}) \\
 &+ 398 \text{ [kg/h]} \times (9.83 \text{ [MJ/kg]}) \\
 &= 5004 \text{ MJ/h} \\
 &= 1.39 \text{ MW}
 \end{aligned}$$

#### **Total Net Exergy Profit**

$$\begin{aligned}
 &= 1.39 - 0.484 \\
 &= 0.906 \text{ MW}
 \end{aligned}$$

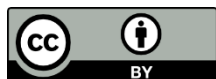

© 2020 by the authors. Submitted for possible open access publication under the terms and conditions of the Creative Commons Attribution (CC BY) license (<http://creativecommons.org/licenses/by/4.0/>).
